# Supplementary material
Source: PubMed Central journal article supplement (PMC3076054)
Supplement: NIHMS257073-supplement-supplemental_data.pdf [file NIHMS257073-supplement-supplemental_data.pdf]

## Supplemental Figure Legends

**SUPPLEMENTAL FIGURE 1.** *C. albicans* induces IL-12 and IL-23 expression within infected skin. *A*, *IL-23p19*, *IL-12p35*, and *IL-12/23p40* mRNA expression 24 hours following *C. albicans* skin infection in WT and the various knockout mice, as measured by Q-PCR. Each dot indicates the amount of mRNA transcript as measured by arbitrary units (AU) of a single specimen and horizontal bars denote the mean of scatter plots. \* =  $p < 0.001$  versus WT. Data was analyzed using Kruskal-Wallis test and Scheffe's F test. *B*, IL-23p19 staining of skin 4 days following infection with *C. albicans*. Scale bars = 0.025 mm. *C*, Quantification of IL-23p19+ cells in each of the 4 groups of mice shown in *B*. Data are expressed as mean  $\pm$  SD. \* =  $p < 0.025$  versus WT. Bar graphs were analyzed with Kruskal-Wallis test and Scheffe's F test. *D*, F4/80 and IL-23p19 staining of serial sections of WT mice skin 4 days following infection with *C. albicans*. Scale bars = 0.025 mm. Arrows indicate double positive cells.

**SUPPLEMENTAL FIGURE 2.** Impaired protein production of IL-17A and IL-22 in IL-23 deficient mice. IL-17A, IL-22, and IL-21 protein expression 48 hours following *Candida* skin infection in WT and the various knockout mice as measured by ELISA. Each dot indicates the level of protein ( $\text{pg mL}^{-1}$ ) of a single specimen and horizontal bars denote the mean of scatter plots. \* =  $p < 0.025$  versus WT.

**SUPPLEMENTAL FIGURE 3.** *C. albicans* induces prominent epidermal hyperplasia overlying the infected dermis in *IL-17A<sup>-/-</sup>*, *IL-22<sup>-/-</sup>* and WT mice. *A*, H&E staining of mouse skin 4 days following infection with *C. albicans*. Scale bars = 0.05 mm. *B*, Quantification of

epidermal hyperplasia in each of the 4 groups of mice shown above. Data are expressed as mean epidermal thickness ( $\mu\text{m}$ )  $\pm$  SD. There were no statistical differences among the groups of mice.

**SUPPLEMENTAL FIGURE 4.** *A*, IL-17A, IL-22, and IL-21 protein expression 48 hours following *Candida* skin infection in WT and the various knockout mice as measured by ELISA. Each dot indicates single specimen and horizontal bars denote the mean of scatter plots. \* =  $p < 0.025$  versus WT. Data was analyzed using Kruskal-Wallis test and Scheffe's F test. *B*, Anti-IL-17A, anti-IL-22 Ab-stained sections of skin 4 days following infection with *C. albicans*. Scale bars = 0.025 mm. *C*, Quantification of IL-17A<sup>+</sup> and IL-22<sup>+</sup> cells in each of the 3 groups of mice shown in *B*. \* =  $p < 0.025$ , \*\* =  $p < 0.001$ . Bar graphs were analyzed using Kruskal-Wallis test and Scheffe's F test.

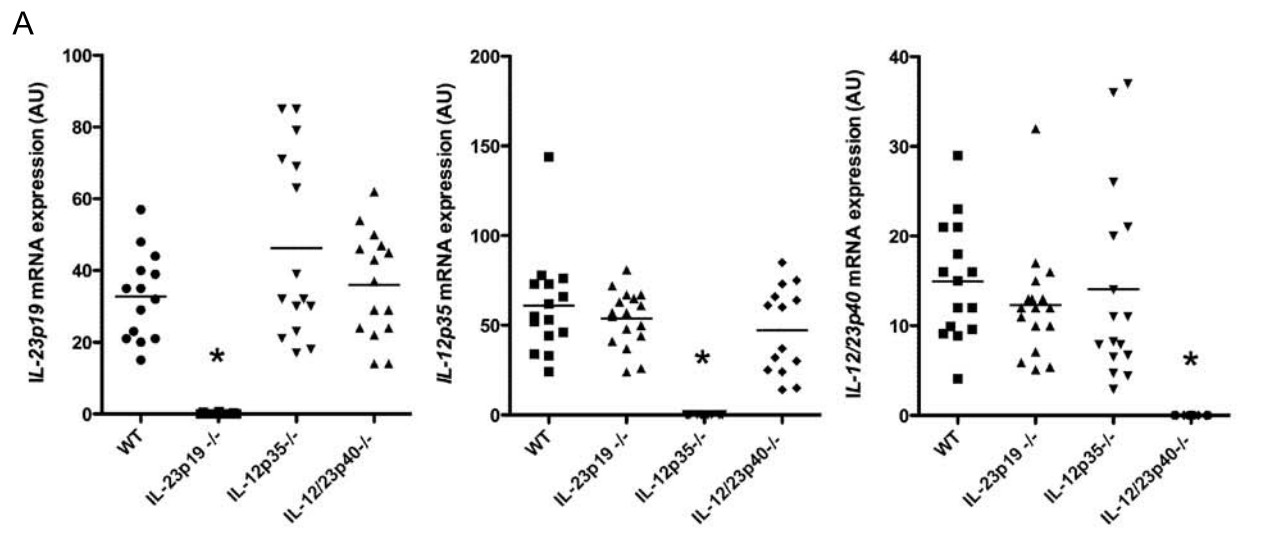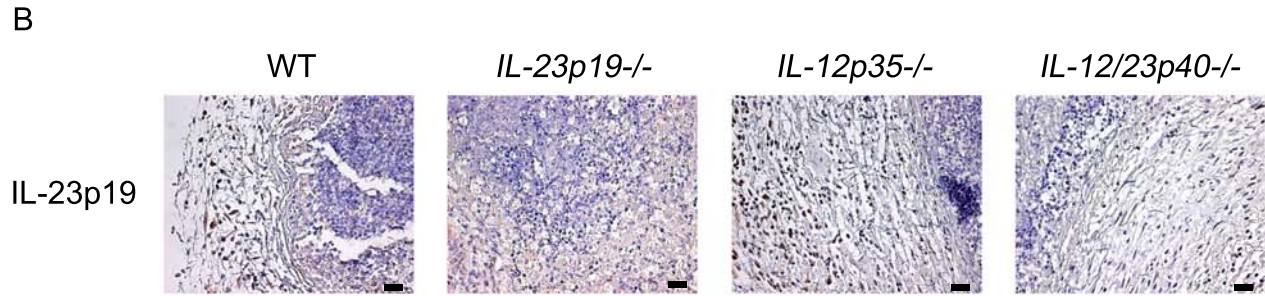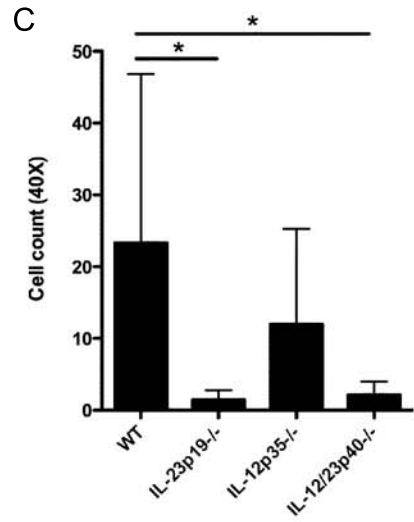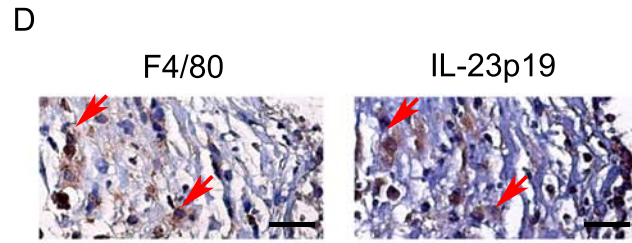

Supplemental Figure 1

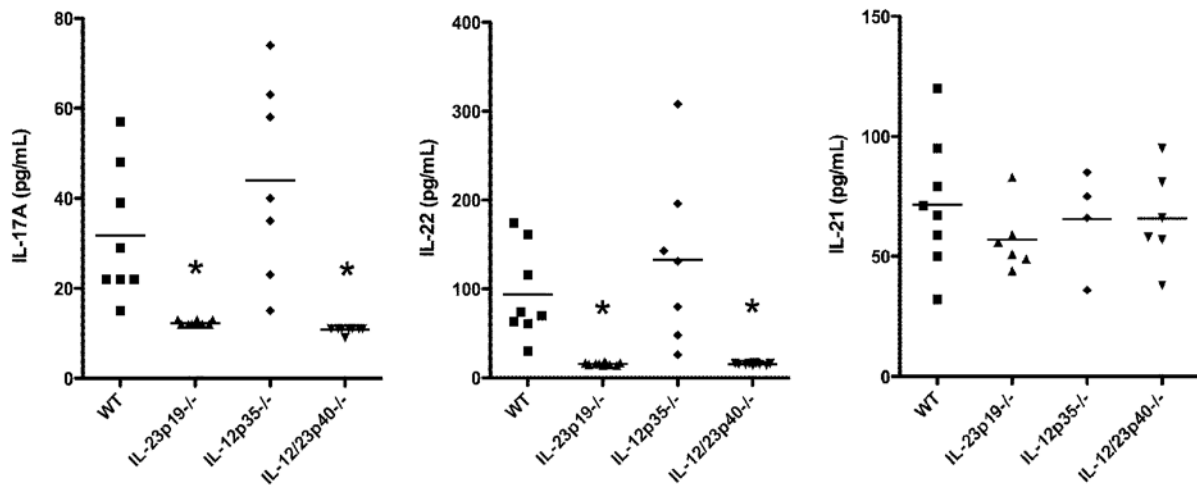

Supplemental Figure 2

A

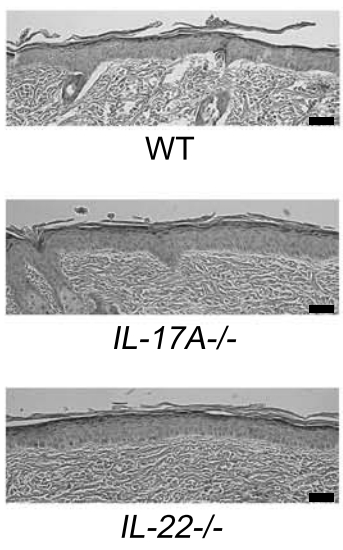

B

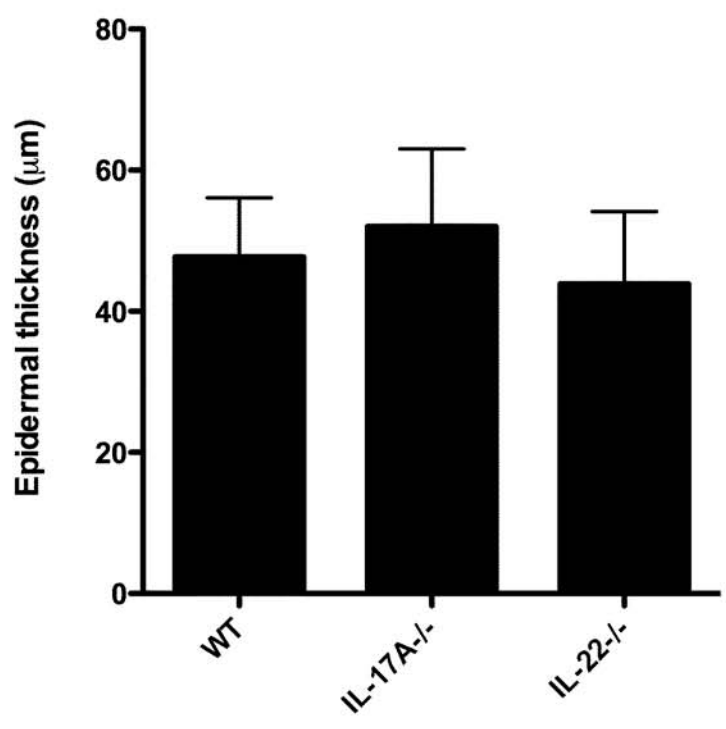

Supplemental Figure 3

A

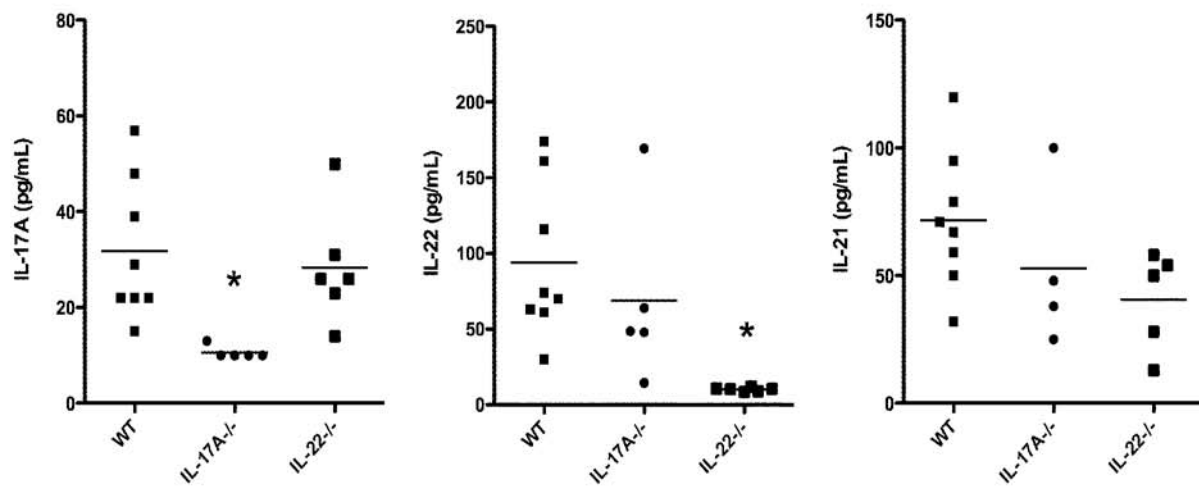

B

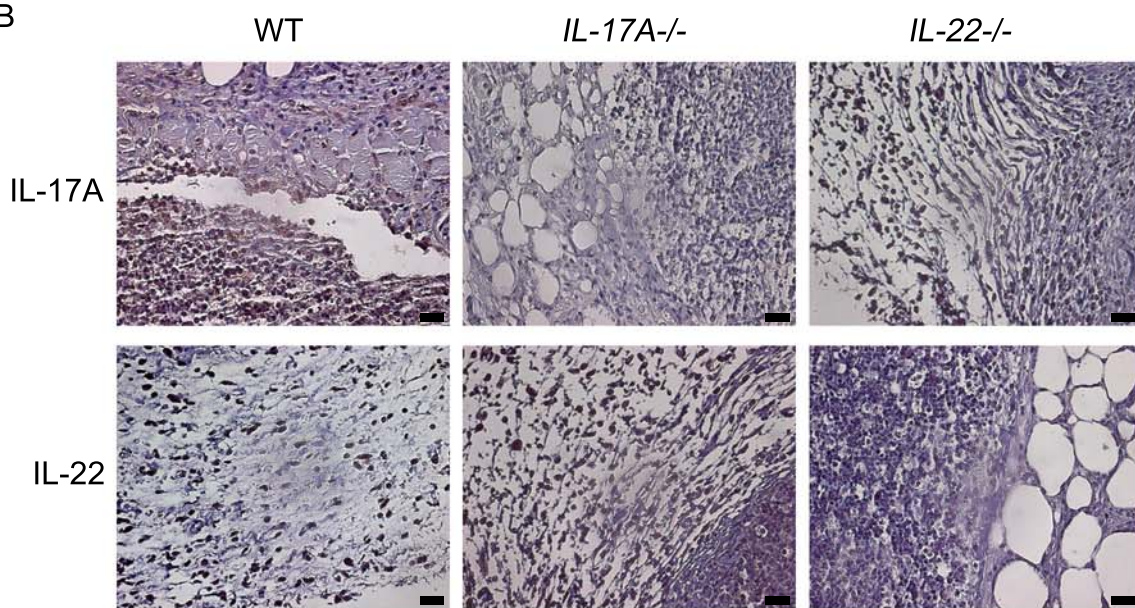

C

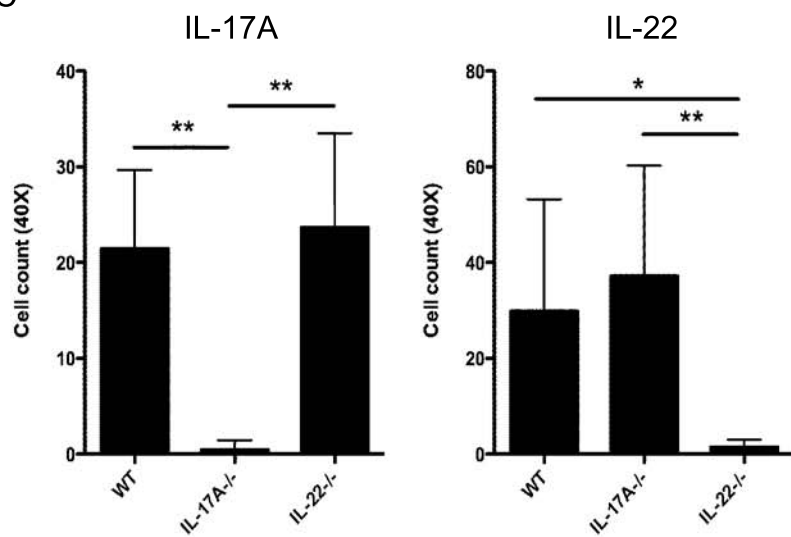

Supplemental Figure 4

**SUPPLEMENTAL TABLE.** Antibodies and conditions used for immunohistochemistry.

|                 | <b>Blocking</b>                                      | <b>Primary Ab</b>                                  | <b>Secondary Ab</b>                                               |
|-----------------|------------------------------------------------------|----------------------------------------------------|-------------------------------------------------------------------|
| <b>IL-17A</b>   | 10% goat serum in PBS                                | Santa Cruz #SC-7927,<br>rabbit anti-IL-17, 1:400   | Vector Laboratories #BA-<br>1000, goat anti-rabbit IgG,<br>1:1000 |
| <b>IL-22</b>    | 10% goat serum in PBS                                | Capralogics #CI-0144,<br>rabbit anti-IL-22, 1:2000 | Vector Laboratories #BA-<br>1000, goat anti-rabbit IgG,<br>1:1000 |
| <b>IL-23p19</b> | 10% goat serum in PBS                                | Anaspec #54595, rabbit<br>anti-IL-23, 1:400        | Vector Laboratories #BA-<br>1000, goat anti-rabbit IgG,<br>1:1000 |
| <b>CD3</b>      | Vector Laboratories #SP-<br>5030 animal-free blocker | Santa Cruz #SC-1127, goat<br>anti-CD3e, 1:1000     | Vector Laboratories #BA-<br>9500, horse anti-goat IgG,<br>1:2000  |
| <b>F4/80</b>    | 5% goat serum and 0.2%<br>BSA in PBS                 | BioLegend #122602, rat<br>anti-F4/80, 1:50         | Vector Laboratories #BA-<br>9400, goat anti-rat IgG,<br>1:500     |
| <b>Gr-1</b>     | 5% goat serum and 0.2%<br>BSA in PBS                 | BD biosciences #550291,<br>rat anti-Gr-1, 1:10     | Vector Laboratories #BA-<br>9400, goat anti-rat IgG,<br>1:500     |
